# Supplementary material for: Data-driven questionnaire-based cluster analysis of asthma in Swedish adults
Source: PubMed Central journal article supplement (PMC7136224; doi:10.1038/s41533-020-0168-0), 2020-04-06

Supplementary material:

**Supplementary Table 1.** The items from the PRAXIS questionnaire used in the study. ICS – inhaled corticosteroids; LABA- long acting beta-2 agonists; LTRA - leukotriene antagonist. ACT-asthma Control Test; mini-AQLQ – mini Asthma Quality of Life Questionnaire.

|                                            | ITEMS                                                                                                                   | ANSWERS                                                                                                                                         |
|--------------------------------------------|-------------------------------------------------------------------------------------------------------------------------|-------------------------------------------------------------------------------------------------------------------------------------------------|
| <b>Variables into the cluster model</b>    |                                                                                                                         |                                                                                                                                                 |
| 1                                          | How old are you?                                                                                                        | ....years                                                                                                                                       |
| 2                                          | Sex                                                                                                                     | Male....Female....                                                                                                                              |
| 3                                          | Length and weight                                                                                                       | ...cm ...kg                                                                                                                                     |
| 4                                          | Do you smoke?                                                                                                           | Never/Ex/Current (daily or occasional)                                                                                                          |
| 5                                          | Age of asthma onset                                                                                                     | <=15 years/16-45 years/>=46 years                                                                                                               |
| 6                                          | Do you have allergy against pets or pollen?                                                                             | Yes often/Sometimes only or No                                                                                                                  |
| 7                                          | Have you had rhinitis in the last 12 months?                                                                            | Yes/No                                                                                                                                          |
| 8                                          | Do you have gastroesophageal reflux in the night (at least once a week)?                                                | Yes/No                                                                                                                                          |
| 9                                          | Have you had diabetes in the last 12 months?                                                                            | Yes/No                                                                                                                                          |
| 10                                         | Have you had cardiovascular disease (heart disease, stroke and hypertension) in the last 12 months?                     | Yes/No                                                                                                                                          |
| 11                                         | Have you had sleep apnea in the last 12 months?                                                                         | Yes/No                                                                                                                                          |
| 12                                         | Have you had depression and/or anxiety in the last 12 months?                                                           | Yes/No                                                                                                                                          |
| 13                                         | Have you had sinusitis in the last 6 months?                                                                            | Yes/No                                                                                                                                          |
| 14                                         | Have you woken up in the night due to asthma symptoms such as cough, wheeze and/or dyspnea (during the last week)?      | No/Once/ Several times                                                                                                                          |
| <b>Not included into the cluster model</b> |                                                                                                                         |                                                                                                                                                 |
| 1                                          | How often do you exercise (until you get out of breath or/and sweat)?                                                   | Daily/few times a week/Once a week/Once a month/Less                                                                                            |
| 2                                          | What is your highest education level?                                                                                   | Compulsory school (up to 15 years old)<br>Secondary school (up to 18 years old)<br>High education (at least 3 years old beyond secondary level) |
| <b>Outcome variables</b>                   |                                                                                                                         |                                                                                                                                                 |
| 1                                          | ACT                                                                                                                     | Reference <sup>27</sup>                                                                                                                         |
| 2                                          | Mini-AQLQ                                                                                                               | Reference <sup>26</sup>                                                                                                                         |
| 3a                                         | Have you visited emergency due to asthma related symptoms during the last 12 months?                                    | Never/Once/ Twice/Three or more times                                                                                                           |
| 3b                                         | Have you used oral corticosteroids (prednisolone or betamethasone) because of asthma symptoms during the last 6 months? | Yes/No                                                                                                                                          |
| 4                                          | Patients reported asthma severity                                                                                       | No current asthma/Very mild/mild/moderate/severe                                                                                                |
| 5                                          | Treatment steps                                                                                                         | (a) No ICS<br>(b) Only ICS<br>(c) ICS+LABA and/or LTRA                                                                                          |

**Supplementary Table 2.** The mean score ( $\pm$ SD) of ACT and mini-AQLQ in three phenotypes in both cohorts.

| <b>Cohort</b>     |                  | <b>Early onset<br/>predominantly<br/>female</b> | <b>Adult onset<br/>predominantly<br/>female</b> | <b>Adult onset<br/>predominantly<br/>male</b> |
|-------------------|------------------|-------------------------------------------------|-------------------------------------------------|-----------------------------------------------|
| <b>Discovery</b>  | <b>ACT</b>       | 18.7 (4.6)                                      | 19.4 (4.7)                                      | 21.0 (4.3)                                    |
|                   | <b>Mini-AQLQ</b> | 5.1 (1.3)                                       | 5.4 (1.2)                                       | 5.8 (1.1)                                     |
| <b>Validation</b> | <b>ACT</b>       | 18.8 (5.1)                                      | 19.9 (4.6)                                      | 20.9 (4.5)                                    |
|                   | <b>Mini-AQLQ</b> | 5.1 (1.4)                                       | 5.4 (1.1)                                       | 5.8 (1.2)                                     |

**Supplementary Table 3.** The Spearman rank correlation between the self-reported severity and the ACT-score/exacerbation history

| <b>Cohort</b>     |                           | <b>Correlation coefficients</b> | <b>P-values</b> |
|-------------------|---------------------------|---------------------------------|-----------------|
| <b>Discovery</b>  | <b>Self--ACT</b>          | -0. 61                          | p<0.001         |
|                   | <b>Self--exacerbation</b> | 0.35                            | p<0.001         |
| <b>Validation</b> | <b>Self-ACT</b>           | -0.67                           | p<0.001         |
|                   | <b>Self--exacerbation</b> | 0.41                            | p<0.001         |

**Supplementary Figure 1.** The silhouette distance analysis suggests the optimal number of clusters (phenotypes) as three.

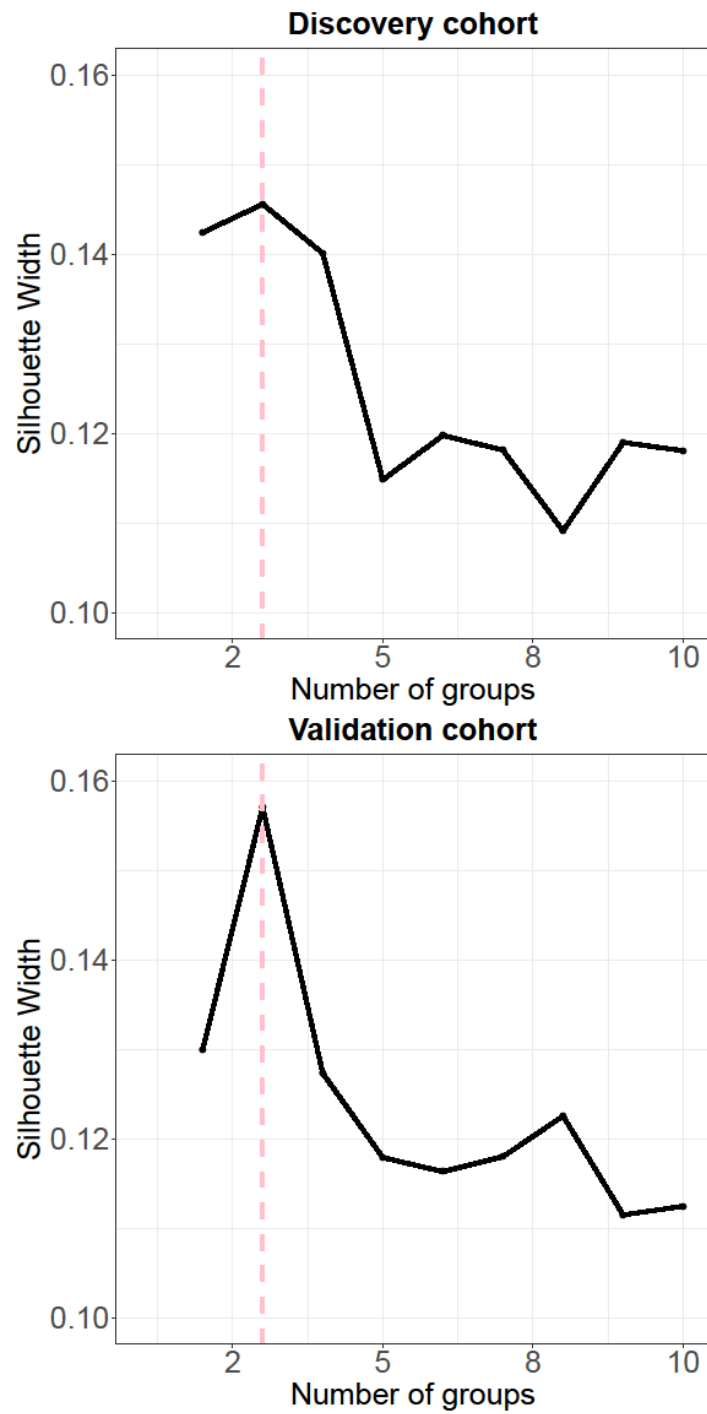

**Supplementary Figure 2.** Visualization the clustering results with t-distributed stochastic neighborhood embedding, or t-SNE method.

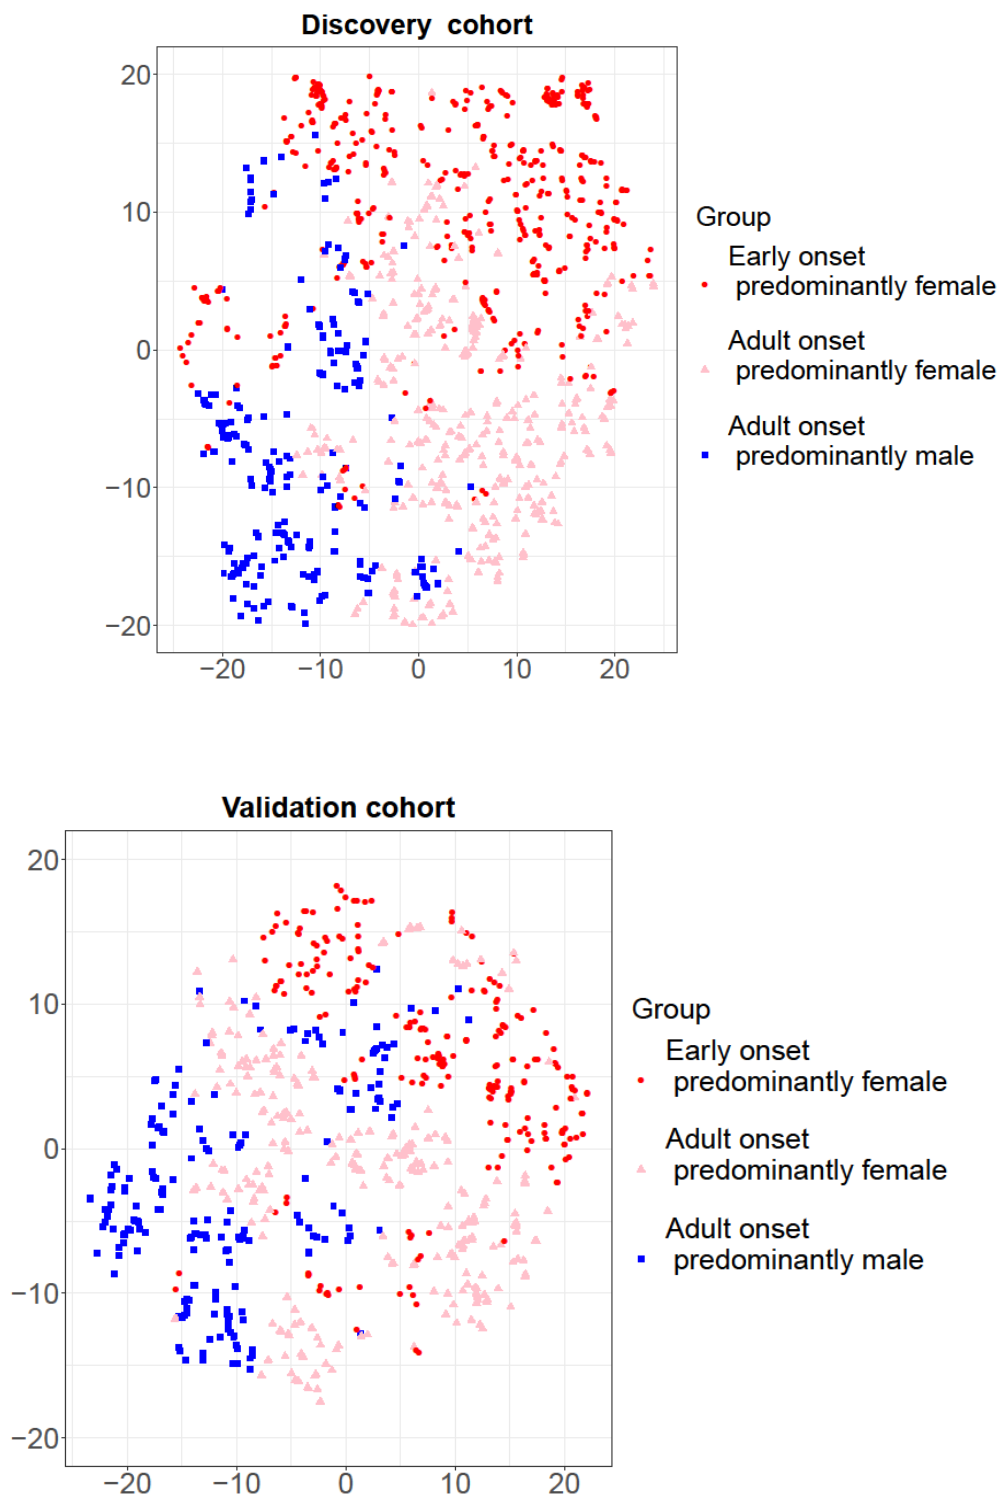

Supplement: 41533_2020_168_MOESM2_ESM.pdf [file 41533_2020_168_MOESM2_ESM.pdf]
